# Supplementary material for: Detection of CpG Methylation in G-Quadruplex Forming Sequences Using G-Quadruplex Ligands
Source: MDPI journal article supplement (doi:10.3390/ijms222313159), 2021-12-06
Supplement: s1 [file s1]

# Detection of CpG methylation in G-quadruplex Forming Sequences using G-quadruplex ligands

Hijiri Hasegawa<sup>1</sup>, Ikkei Sasaki<sup>2</sup>, Kaori Tsukakoshi<sup>2</sup>, Yue Ma<sup>3</sup>, Kazuo Nagasawa<sup>2</sup>, Shusuke Numata<sup>4</sup>, Yuuki Inoue<sup>1</sup>, Yeji Kim<sup>1</sup> and Kazunori Ikebukuro<sup>2\*</sup>

<sup>1</sup> LG Japan Lab Inc., 4-13-14 Higashi Shinagawa, Shinagawa-ku, Tokyo 140-0002, Japan

<sup>2</sup> Department of Biotechnology and Life Science, Tokyo University of Agriculture and Technology, 2-24-16 Naka-cho, Koganei, Tokyo 184-8588, Japan

<sup>3</sup> Institute of Global Innovation Research, Tokyo University of Agriculture and Technology, 2-24-16 Naka-cho, Koganei, Tokyo 184-8588, Japan

<sup>4</sup> Department of Psychiatry, Graduate School of Biomedical Sciences, Tokushima University, 3-8-15 Kuramoto-cho, Tokushima 770-8503, Japan

\* Corresponding Author

E-mail: [ikebu@cc.tuat.ac.jp](mailto:ikebu@cc.tuat.ac.jp)

## Table of Contents

## Materials and Methods

Native-polyacrylamide gel electrophoresis analysis.

## Supporting Figures

Table S1. DNA sequences used in this study.

Figure S1. Circular dichroism spectra of unmethylated and methylated G-quadruplex DNAs.

Figure S2. Native-polyacrylamide gel electrophoresis of DNA/L1Cy5-7OTD complex.

Figure S3. Circular dichroism spectra of *BCL-2-87* and methylated *BCL-2-87*.

Figure S4. Binding assay of L1Cy5-7OTD to *BCL-2-87* and methylated *BCL-2-87*.

Table S2. DNA sequence of major depressive disorder marker model DNA.

## MATERIALS AND METHODS

**Native-polyacrylamide gel electrophoresis (Native-PAGE) analysis.** Methylated or unmethylated *BCL-2-87* or polyT-87 were mixed with a 5'-probe, 3'-probe, or both (Table S1). The heat-treated oligonucleotide samples (final concentration (f.c.) 500 nM) were mixed with L1Cy5-7OTD (f.c. 2.5  $\mu$ M) in TK buffer (10 mM Tris-HCl, 100 mM KCl; pH 7.4). After incubation at RT for 1 h, the mixtures were loaded on 15% polyacrylamide gel, which was separated at a constant current of 20 mA in TBE buffer (89 mM Tris-HCl, 89 mM H<sub>3</sub>BO<sub>4</sub>, 2 mM EDTA; pH 8.3). L1Cy5-7OTD was visualized by measuring Cy5 fluorescence using Typhoon 8600 (GE Healthcare; Little Chalfont, UK). The oligonucleotides were stained with SYBR Gold Nucleic Acid Gel Stain (Thermo Fisher Scientific) and scanned using a Gel Doc EZ Imager (Bio-Rad Laboratories; Hercules, CA, USA).

**Table S1.** DNA sequences used in this study. The methylated CpG sites are underlined.

| Name            | DNA Sequence (5'→3')                                                                                                   |
|-----------------|------------------------------------------------------------------------------------------------------------------------|
| <i>BCL-2</i> G4 | <u>C</u> GGG <u>C</u> GC <u>G</u> GGAGGAAGGGG <u>C</u> GGGAGC                                                          |
| <i>HRAS2</i> G4 | <u>C</u> GGGG <u>C</u> GGGG <u>C</u> GGGGG <u>C</u> GGGGG <u>C</u> G                                                   |
| <i>VEGF</i> G4  | GGGGC <u>G</u> GGC <u>C</u> GGGGG <u>C</u> GGGG                                                                        |
| <i>HRAS1</i> G4 | T <u>C</u> GGGTTG <u>C</u> GGG <u>C</u> GCAGGGCA <u>C</u> GGG <u>C</u> G                                               |
| <i>BCL-2-87</i> | GCGGGCGGGCGGGCAGGCGGCGGAGGGG <u>C</u> GGG <u>C</u> GGGAGGAAGGGG <u>C</u> GGGAG <u>C</u> GGGGCTGTGGTGCCTGTCCTCTTACTTCAT |
| PolyT-87        | GCGGGCGGGCGGGCAGGCGGCGGAGGGGTTTTTTTTTTTTTTTTTTTTTTTTTTTTTTGGGGCTGTGGTGCCTGTCCTCTTACTTCAT                               |
| 5'-probe        | CCCCTCCGCGCCGCCTGCCCGCCCGCCGC                                                                                          |
| 3'-probe        | ATGAAGTAAGAGGACAGGCACCACAGCCCC                                                                                         |

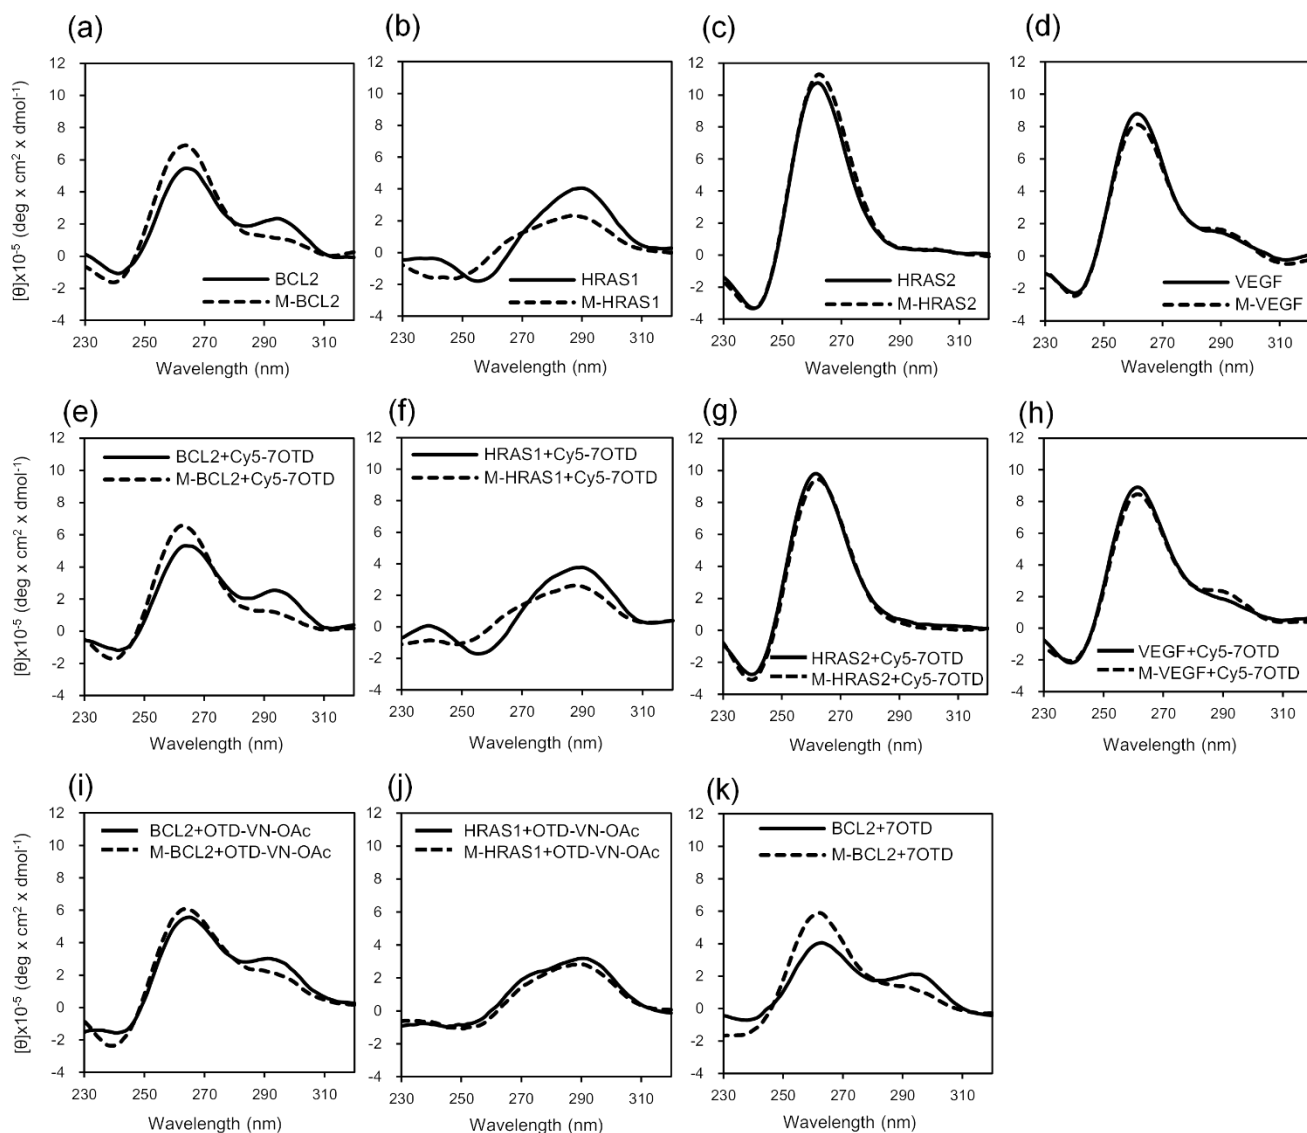

**Figure S1.** Circular dichroism (CD) spectra of unmodified (solid line) and methylated (dot line) (a) *BCL-2* G4, (b) *HRAS1* G4, (c) *HRAS2* G4, and (d) *VEGF* G4 in 10 mM Tris-HCl, 100 mM KCl, pH 7.4; (e) *BCL-2* G4, (f) *HRAS1* G4, (g) *HRAS2* G4 and (h) *VEGF* G4 in the presence of L1Cy5-7OTD; and (i) *BCL-2* G4, (j) *HRAS1* G4 in the presence of OTD-VN-OAc; and (k) *BCL-2* G4 in the presence of L1H1-7OTD. DNA concentration: 1  $\mu$ M, L1Cy5-7OTD, OTD-VN-OAc and L1H1-7OTD concentrations: 5  $\mu$ M.

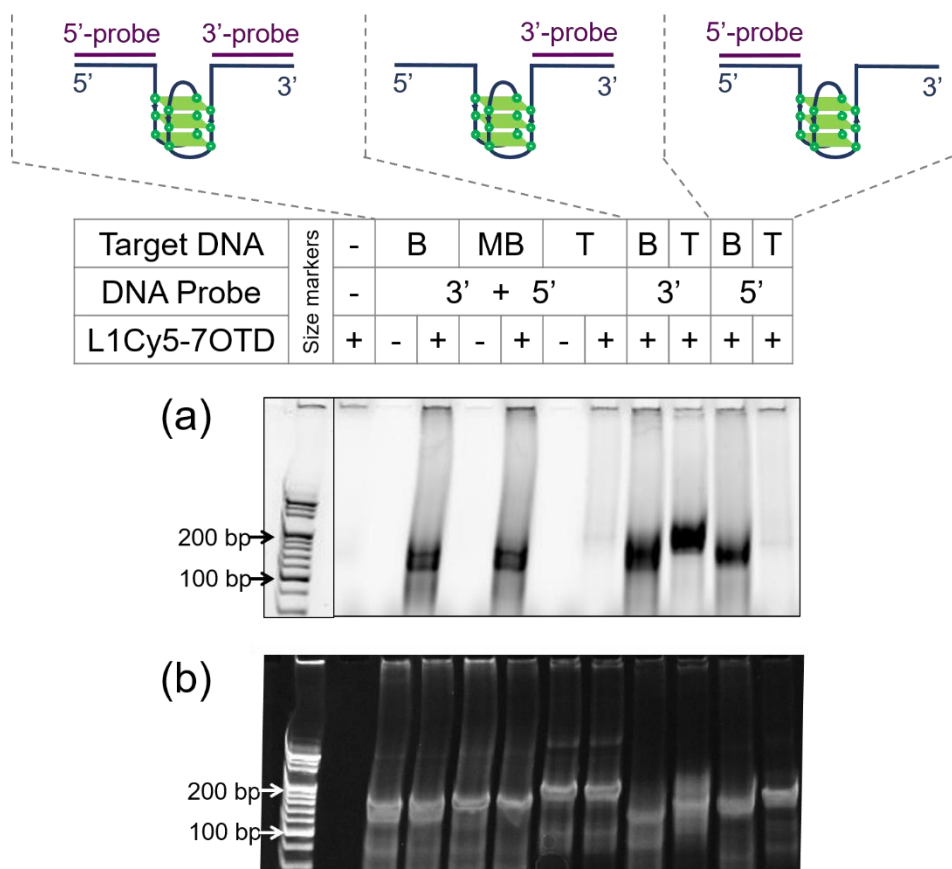

**Figure S2.** Native-polyacrylamide gel electrophoresis (Native-PAGE) of DNA/L1Cy5-7OTD complex. *BCL*-2-87 (B), methylated *BCL*-2-87 (MB), polyT-87 (T) were hybridized with 3'-probe (3'), 5'-probe (5'), or both probe (3'+5'), and these DNA samples were mixed with L1Cy5-7OTD. (a) Cy5 of L1Cy5-7OTD was detected. (b) DNAs were stained with SYBR Gold and detected. 20 bp ladder pre-mixed with DNA binding fluorescent dye was used as size markers.

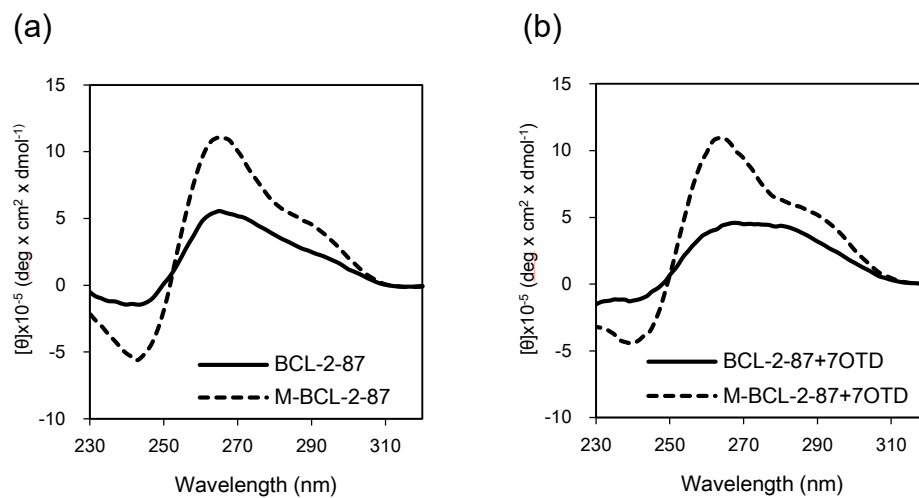

**Figure S3.** Circular dichroism (CD) spectra of 1  $\mu$ M *BCL-2-87* and methylated *BCL-2-87* (*M-BCL-2-87*) in (a) 10 mM Tris-HCl, 100 mM KCl, pH 7.4 and (b) in the presence of 5  $\mu$ M L1H1-7OTD. *BCL-2-87* and *M-BCL-2-87* were hybridized with 3'-probe and 5'-probe. The CD spectra of the *BCL-2* G4 sequence in *BCL-2-87* and *M-BCL-2-87* were determined by subtracting the CD spectrum of a mixed sample consisting of 3' and 5' probes and their complementary strands.

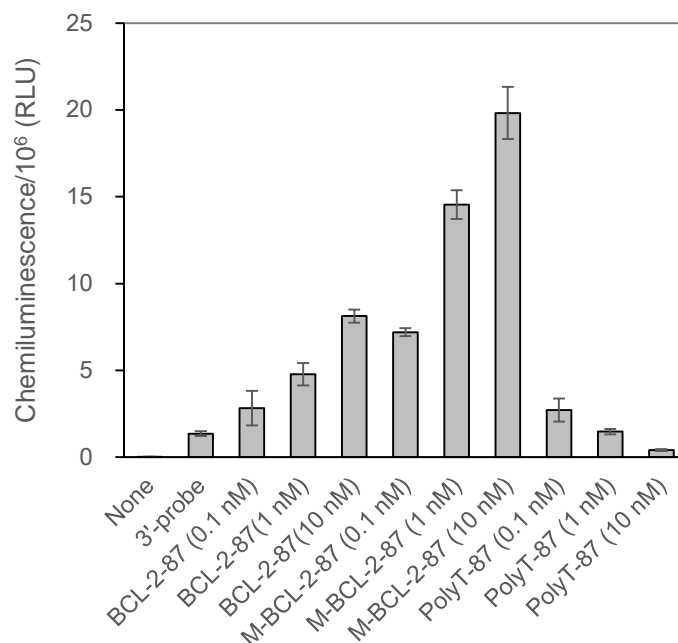

**Figure S4.** Binding assay of L1Cy5-7OTD to *BCL-2-87* and methylated *BCL-2-87* (M-*BCL-2-87*). Binding abilities of L1Cy5-7OTD to target DNAs were determined by chemiluminescence intensities. Target DNAs hybridized with 5'-probe were immobilized on a microplate via 3'-probe, then chemiluminescence was detected after incubation with L1Cy5-7OTD and antibodies. PolyT-87 was used as a negative control.

**Table S2.** DNA sequence of major depressive disorder (MDD) marker model DNA. The methylated CpG sites are underlined. CpG site reported as MDD marker is shown in bold.

| Name            | DNA Sequence (5'→3')                                                       |
|-----------------|----------------------------------------------------------------------------|
| cg26910488_comp | GGGGAGGCC <u>CG</u> TGAGCTCGGAAAGGCACCG <u><b>CG</b></u> GGGGCCGGCATTAGGGC |
